# Supplementary material
Source: Springer Nature journal article supplement (https://www.springermedizin.de/resource/supplementary/13058_2012_3163_MOESM4_ESM.pdf/9703400)

# Fig 3B

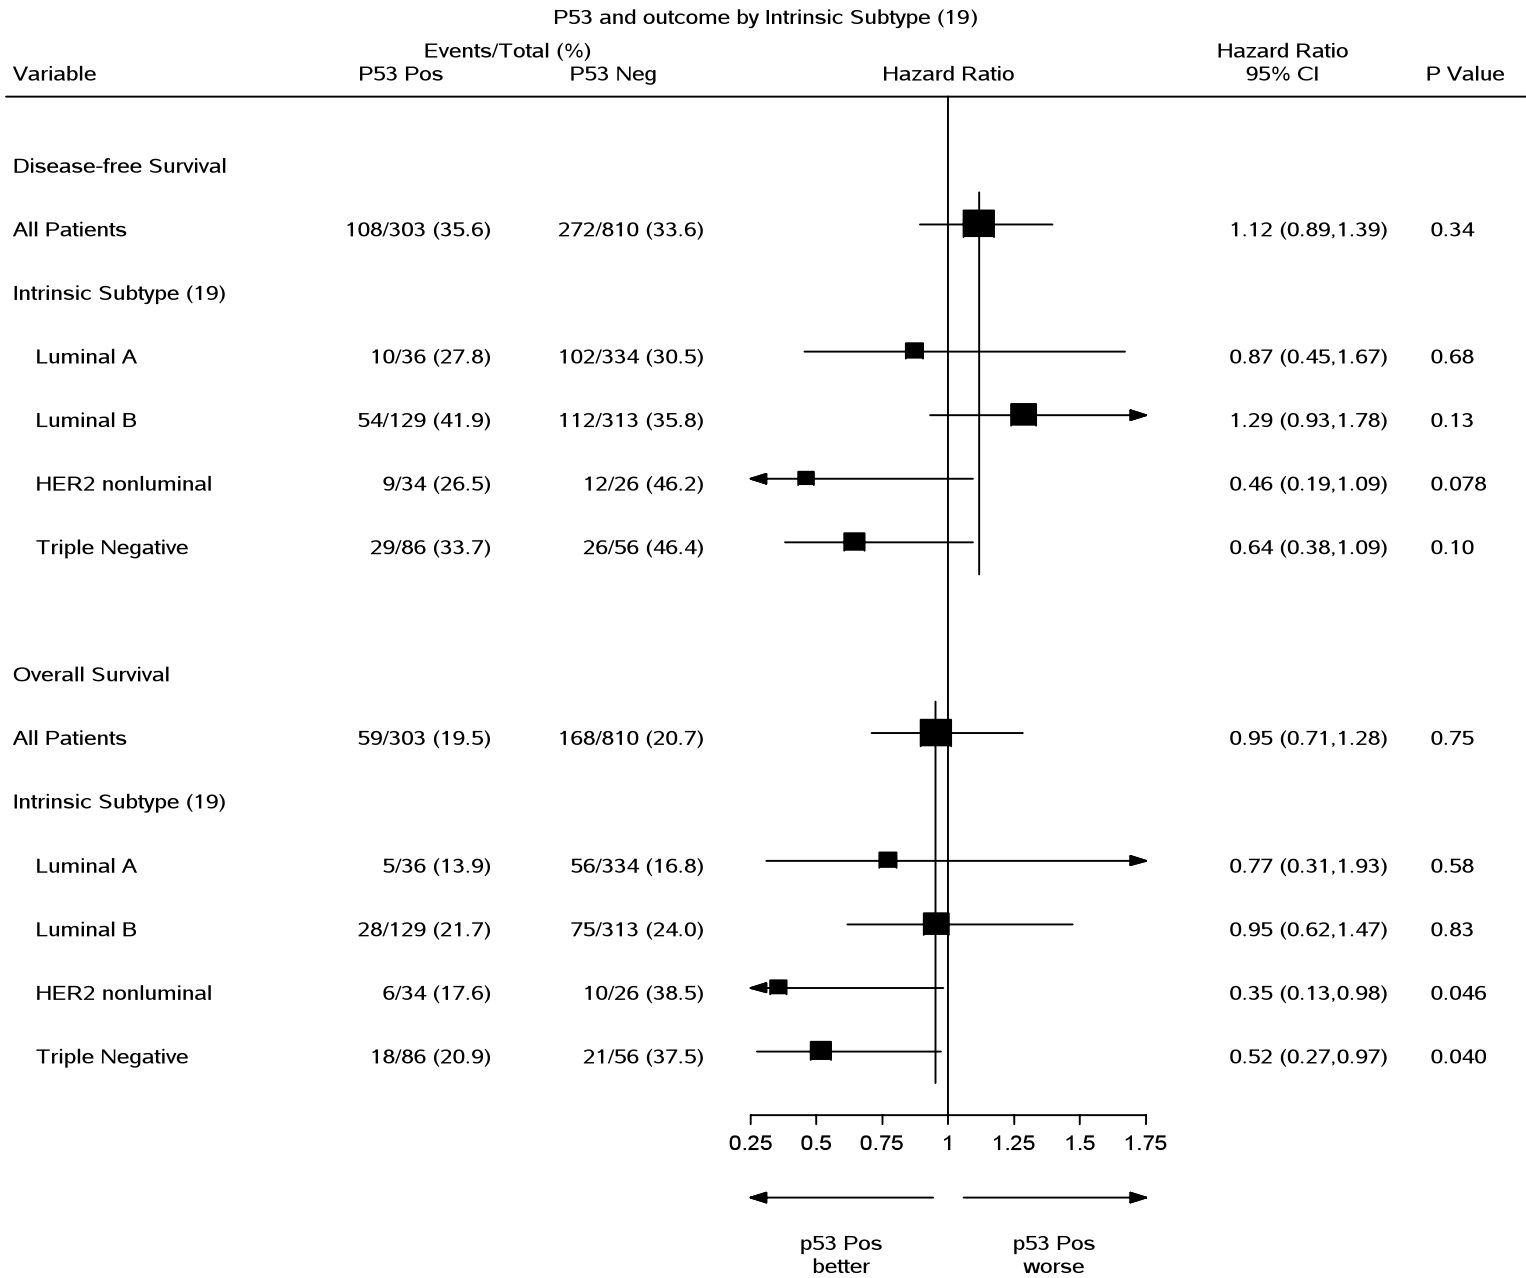

Supplement: MOESM4 [file 9703400]
